# Supplementary material
Source: Springer Nature journal article supplement (https://www.springermedizin.de/resource/supplementary/12990_2009_257_MOESM9_ESM.pdf/9612900)

**A**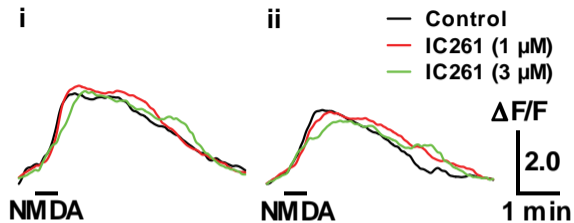**B**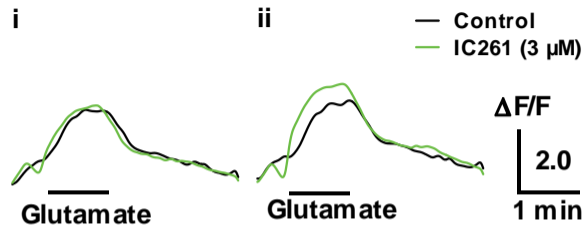**C**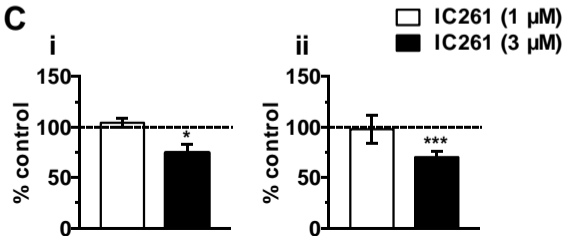**D**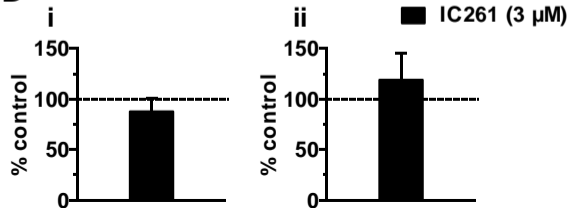

Supplement: MOESM9 [file 9612900]
